# Supplementary material for: The translational repressor 4E-BP called to order by eIF4E: new structural insights by SAXS
Source: PubMed Central journal article supplement — Nucleic Acids Res. 2010 Dec 22;39(8):3496–503. doi: 10.1093/nar/gkq1306 (PMC3082885; doi:10.1093/nar/gkq1306), 2010-12-22
Supplement: supp_gkq1306_Supplementary_Fig_2.pdf [file supp_gkq1306_Supplementary_Fig_2.pdf]

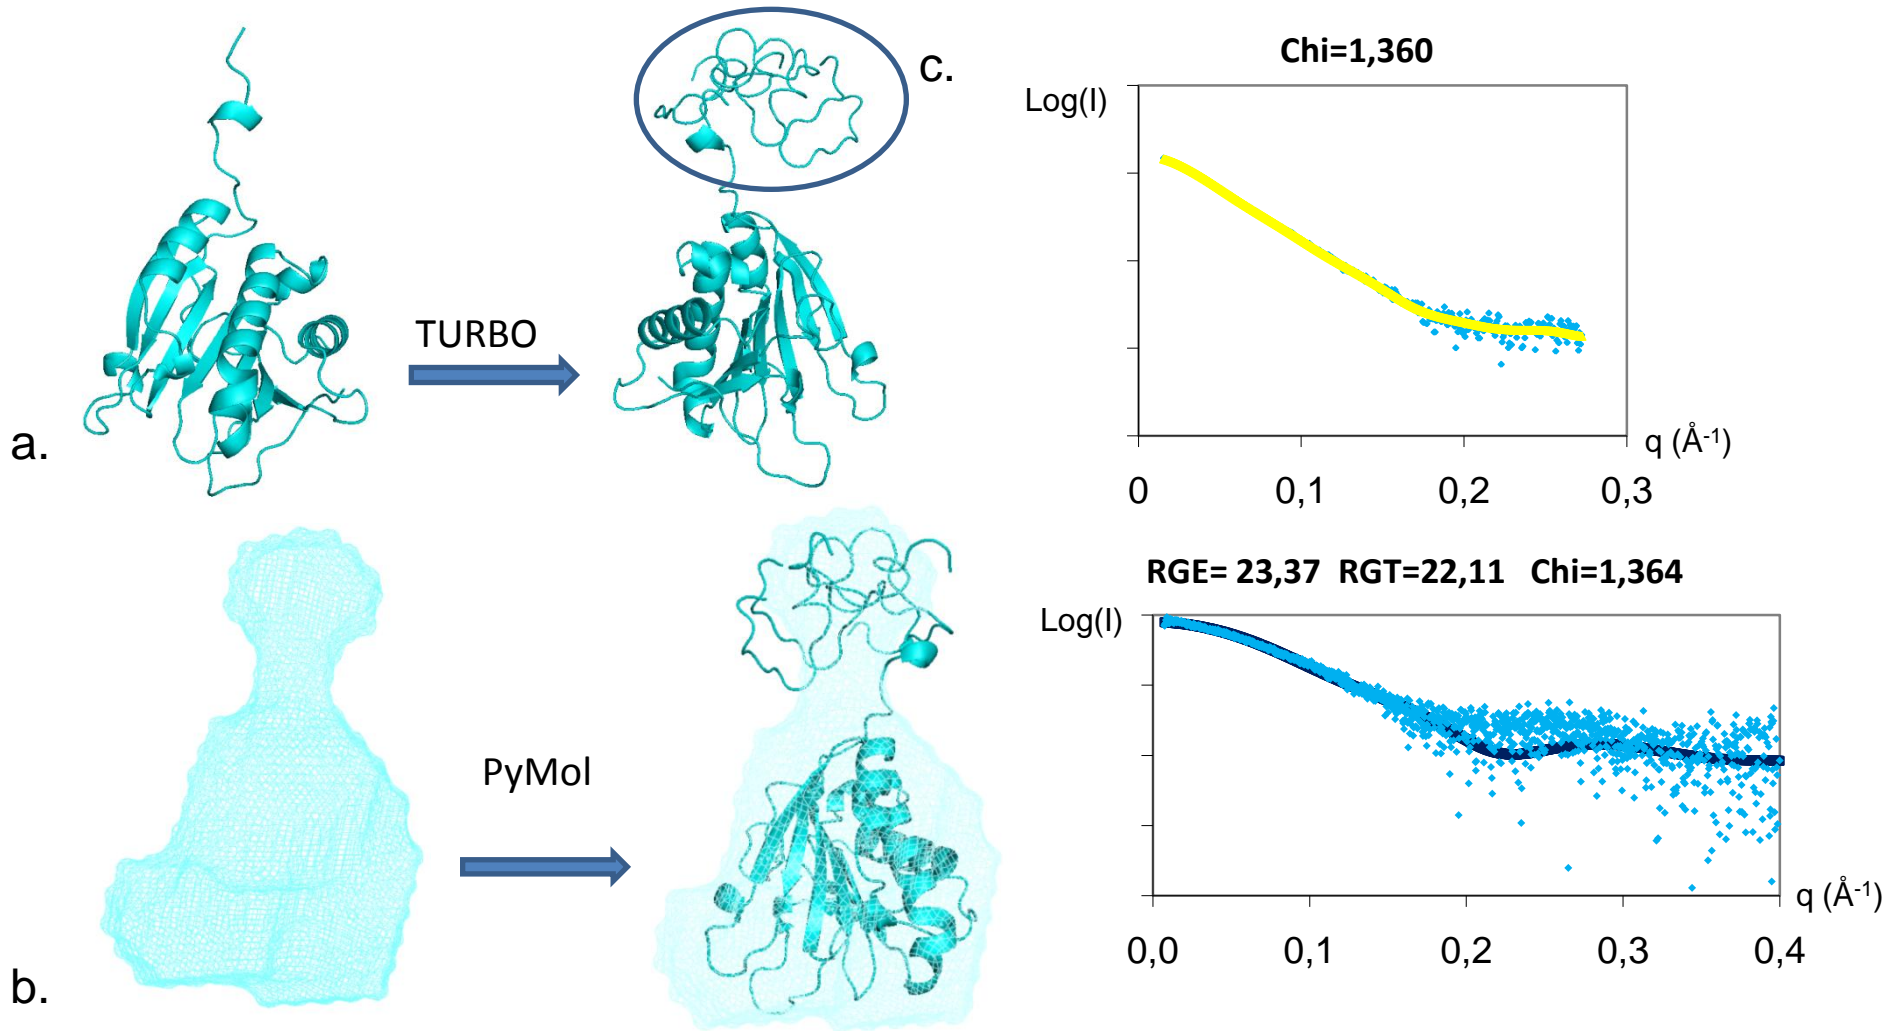

### Supplementary Fig.2: Solution structure of eIF4E.

- Crystallographic structure of eIF4E1 (PDB number: 1L8B) where the 30 aminoacids on the N-ter are missing due to the fact that this disordered region is a problem for crystallization. The 30 amino acids of the Nter extremities have been added using the program TURBO. To simulate the flexibility of this region, we created 4 different orientations (blue circle).
- Low resolution model of eIF4E display in cyan blue obtained by SAXS, superimposed with the TURBO model created from eIF4E cristallographic structure.
- Experimental SAXS profile of eIF4E (cyan blue) fitted by the scattering curves calculated with the program DAMMIF (yellow) and the program CRY SOL (dark blue). RGE: Radius of gyration estimated from the experimental curve. RGT: Radius of gyration estimated from theoretical curve. Chi: Discrepancy between theoretical and experimental curves.
