# Supplementary material for: The translational repressor 4E-BP called to order by eIF4E: new structural insights by SAXS
Source: PubMed Central journal article supplement — Nucleic Acids Res. 2010 Dec 22;39(8):3496–503. doi: 10.1093/nar/gkq1306 (PMC3082885; doi:10.1093/nar/gkq1306), 2010-12-22
Supplement: supp_gkq1306_Supplementary_fig_4.pdf [file supp_gkq1306_Supplementary_fig_4.pdf]

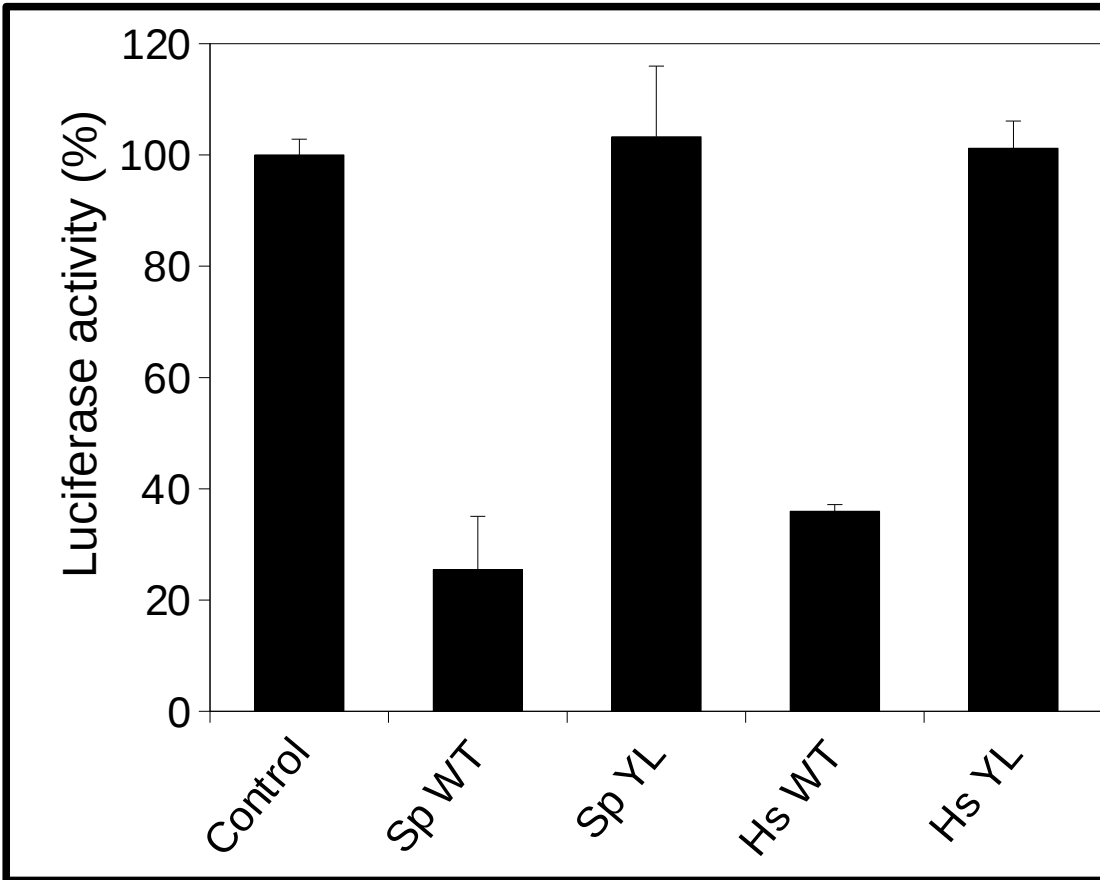

**Supplementary fig. 4 : Sea urchin (Sp) 4E-BP and Human (Hs) 4E-BP1 repress translation in a mammalian system.**

Recombinant 4E-BP proteins and capped / polyadenylated luciferase mRNA were produced as described previously (Oulhen, PlosOne, 2009). 5 fmol of reporter mRNA was incubated in rabbit reticulocyte lysate (Promega) with 200 ng of recombinant Sp 4E-BP, Hs 4E-BP1, or their variants -respectively Sp YL and Hs YL- that do not interact with eIF4E (Oulhen, PlosOne, 2009). Translation with the control protein (GST) was arbitrarily set to 100%. Error bars represent the standard deviation of triplicates.
