# Supplementary material for: The translational repressor 4E-BP called to order by eIF4E: new structural insights by SAXS
Source: PubMed Central journal article supplement — Nucleic Acids Res. 2010 Dec 22;39(8):3496–503. doi: 10.1093/nar/gkq1306 (PMC3082885; doi:10.1093/nar/gkq1306), 2010-12-22
Supplement: supp_gkq1306_Supplementary_Fig_5.pdf [file supp_gkq1306_Supplementary_Fig_5.pdf]

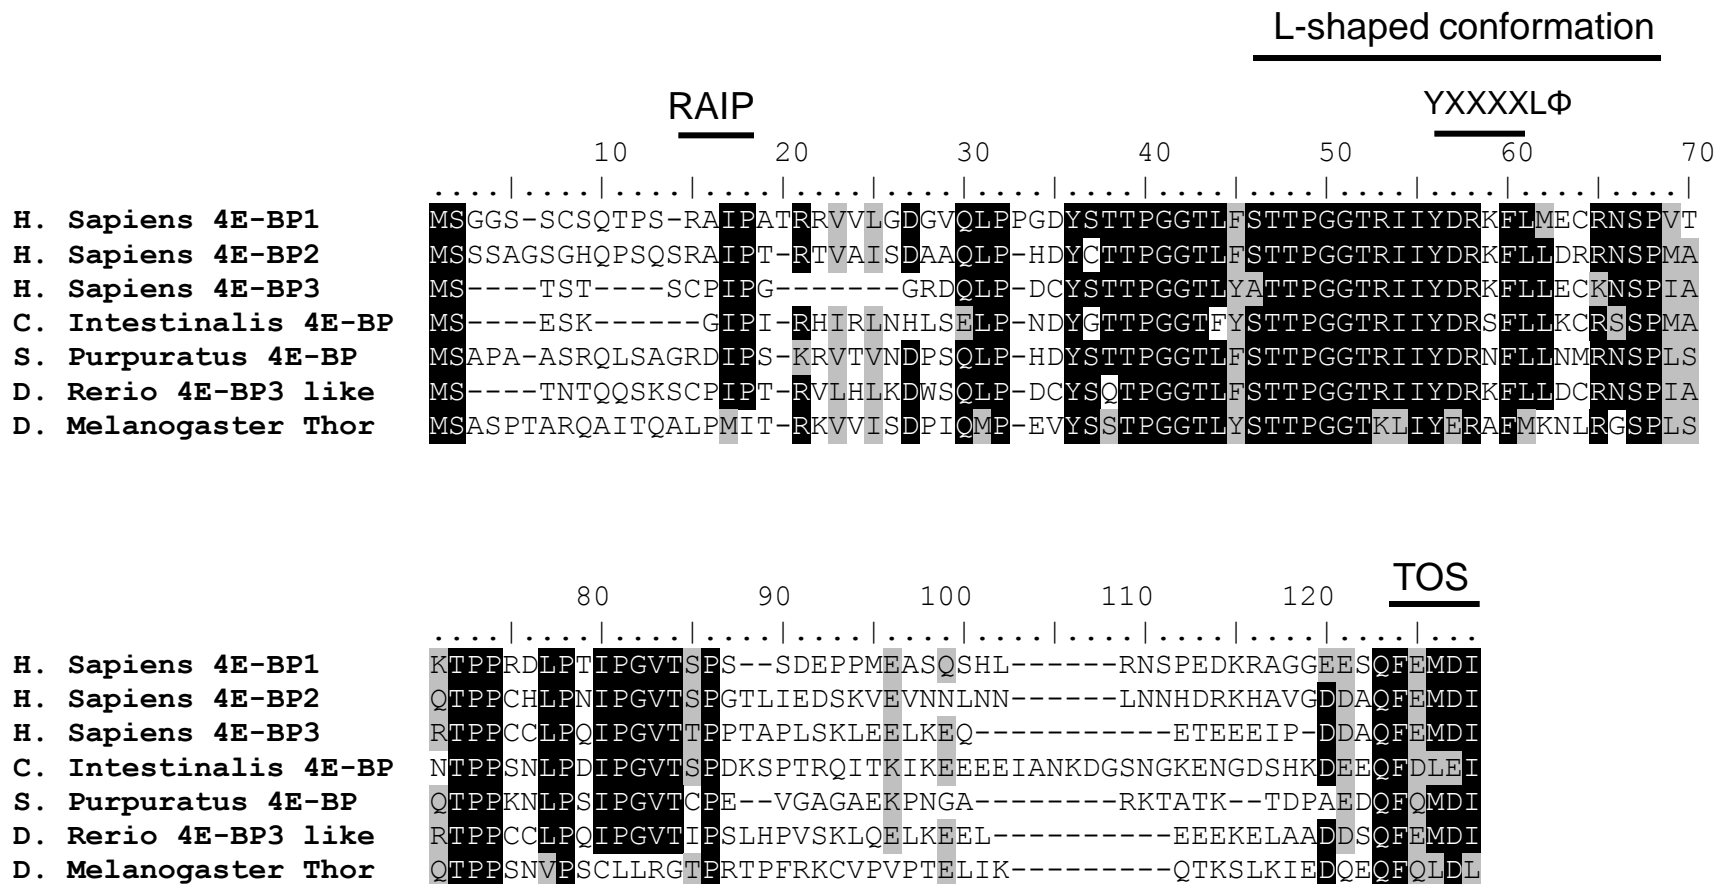

### Supplementary fig.5: Aligement of 4E-BP proteins

The three *Homo sapiens* 4E-BPs, *Ciona intestinalis* 4E-BP, *Strongylocentrotus purpuratus* 4E-BP, *Danio rerio* 4E-BP3 like, *Drosophila melanogaster* Thor were aligned with Bio Edit (Hall, 1999). Accession numbers of human proteins are: 4E-BP1 (NP\_004086), 4E-BP2 (Q13542), 4E-BP3 (NP\_003723) on NCBI. The Accession number is NP\_001077103 for *Strongylocentrotus purpuratus* (NCBI), NP\_955977 for *Danio rerio* (NCBI), NP\_477295 for *Drosophila melanogaster* (NCBI), 299279 for *Ciona intestinalis* (<http://genome.jgi-psf.org/Cioin2/>). Identical and conserved amino acid residues are on black and grey background, respectively. The common eIF4E binding motif indicated by YxxxxLΦ (where x is any amino acid and Φ is an hydrophobic residue), the RAIP motif and the TOS (TOR signalling) [29] site are denoted with a line above.
